# Supplementary material for: Magnetic-enhanced fluorescence sensing of tumor miRNA by combination of MNPs@PDA with duplex specific nuclease
Source: Royal Society of Chemistry journal article supplement (doi:10.1039/d0ra09237a), 2021-01-01
Supplement: d0ra09237a1.pdf [file d0ra09237a1.pdf]

## Supporting information

### **Magnetic-enhanced fluorescence sensing of tumor miRNA by combination of MNPs@PDA with duplex specific nuclease**

Yujie Sun, Cancan Wang, Lina Tang, Yulin Zhang\*, Guo-Jun Zhang\*

School of Laboratory Medicine, Hubei University of Chinese Medicine, 16  
Huangjia Lake West Road, Wuhan 430065, People's Republic of China

\* Corresponding author: Tel: +86-27-68890259, Fax: +86-27-68890259

E-mail: zhanggj@hbtcu.edu.cn; zhangyulin2001@163.com

Table S1. Sequences of miRNA and probes used in the experiment

| Name                    | Sequence (5' -3' )         | Length (nt) |
|-------------------------|----------------------------|-------------|
| P-141 (P <sub>0</sub> ) | FAM-CCATCTTTACCAGACAGTGTTA | 22          |
| miRNA-141               | UAACACUGUCUGGUAAAGAUGG     | 22          |
| miRNA-21                | UAGCUUAUCAGACUGAUGUUGA     | 22          |
| OM-RNA                  | UAACAAUGUCUGGUAAAGAUGG     | 22          |
| SM ssDNA                | TGAGGTAGTAGGTTGTGTGGTT     | 22          |

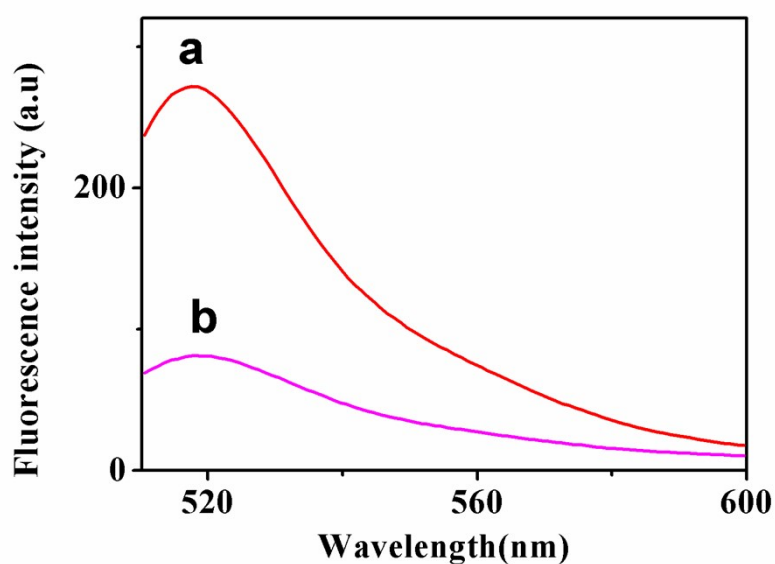

**Fig. S1.** Fluorescence emission spectra of (a) FAM-DNA+MNPs@PDA (b) FAM-DNA+ MNPs@PDA +Ca<sup>2+</sup>.

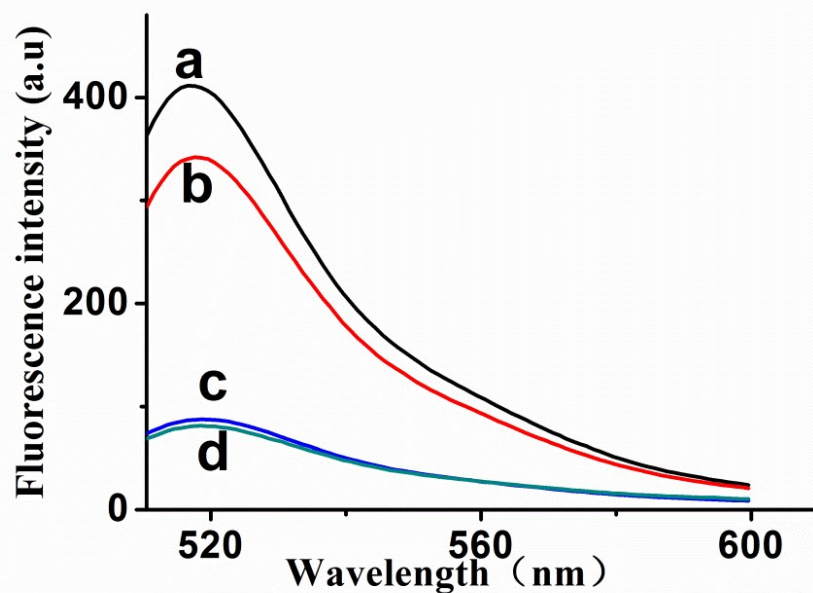

**Fig. S2.** Fluorescence emission spectra of (a) DSN+miRNA+FAM-DNA+PDA@MNPs (after magnetic absorption) (b) DSN+miRNA+FAM-DNA+PDA@MNPs (before magnetic absorption) (c) DSN+FAM-DNA+PDA@MNPs (after magnetic absorption) (d) DSN+FAM-DNA+PDA@MNPs (before magnetic absorption).

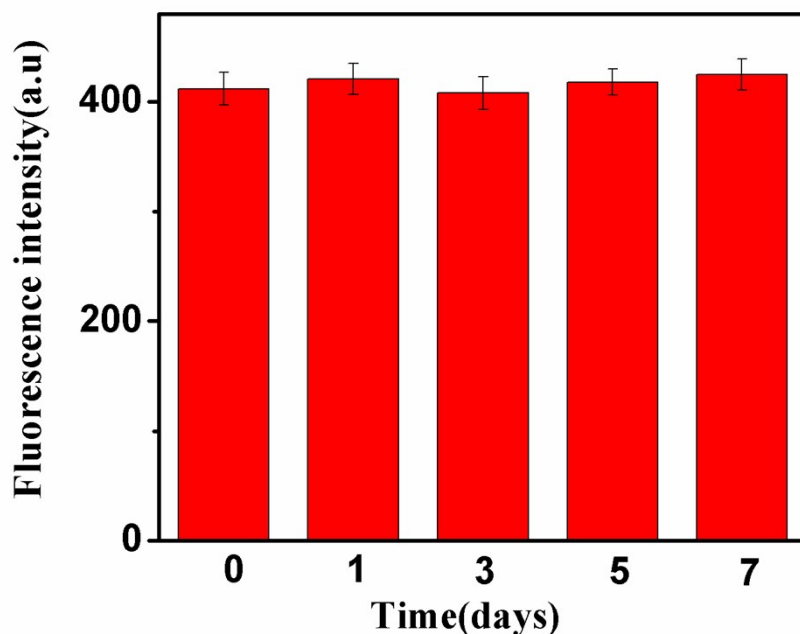

**Fig. S3.** Stability test for the biosensor over one week. The concentration of miRNA-141 is 500 pM.

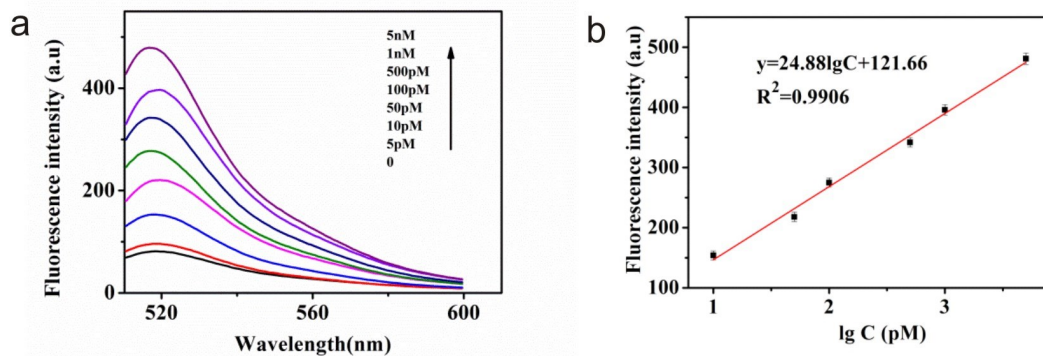

**Fig. S4.** Fluorescence emission spectra of P0 (40 nM) before magnetic absorption with varying concentrations of T1 (a to j: 0, 5 pM, 10 pM, 50 pM, 100 pM, 500 pM, 1 nM, 5 nM, respectively). (b) Scatter plot of the fluorescence intensity vs. logarithm of T1 concentration.
